# Supplementary material for: Identification of a nomogram based on an 8-lncRNA signature as a novel diagnostic biomarker for head and neck squamous cell carcinoma
Source: publisher site journal article supplement (doi:10.18632/aging.104014), 2020-10-20
Supplement: Supplementary file [file aging-v12i20-104014-supplementary-material-SD2.pdf]

**SUPPLEMENTARY FIGURES**

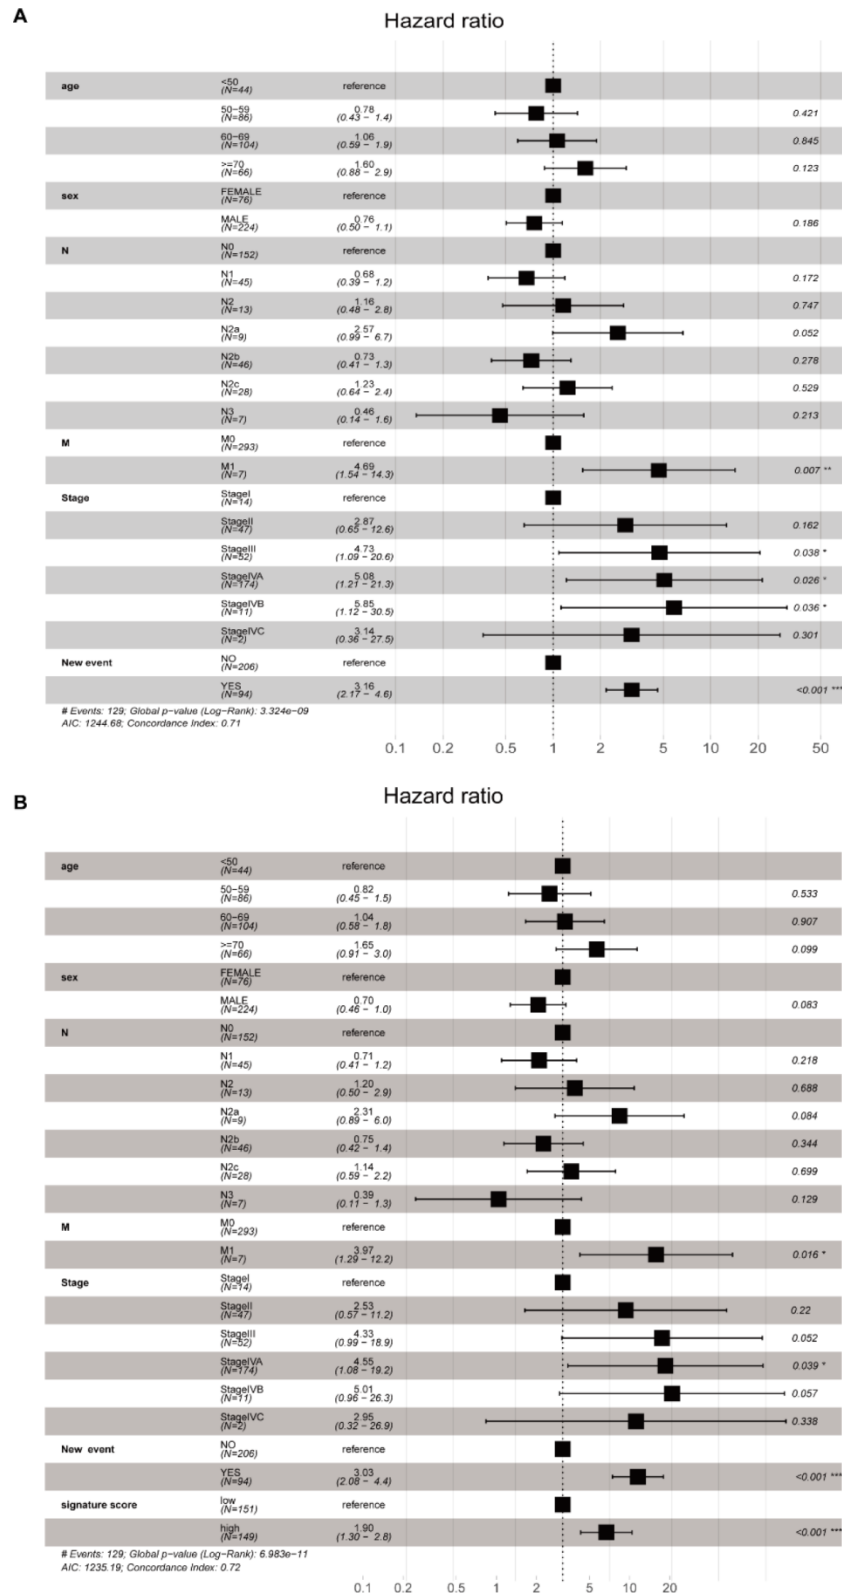

**Supplementary Figure 1. Comparison of the multivariate Cox regression results of the two groups with and without the signature score. (A) The group without the signature score. (B) The group with the signature score.**

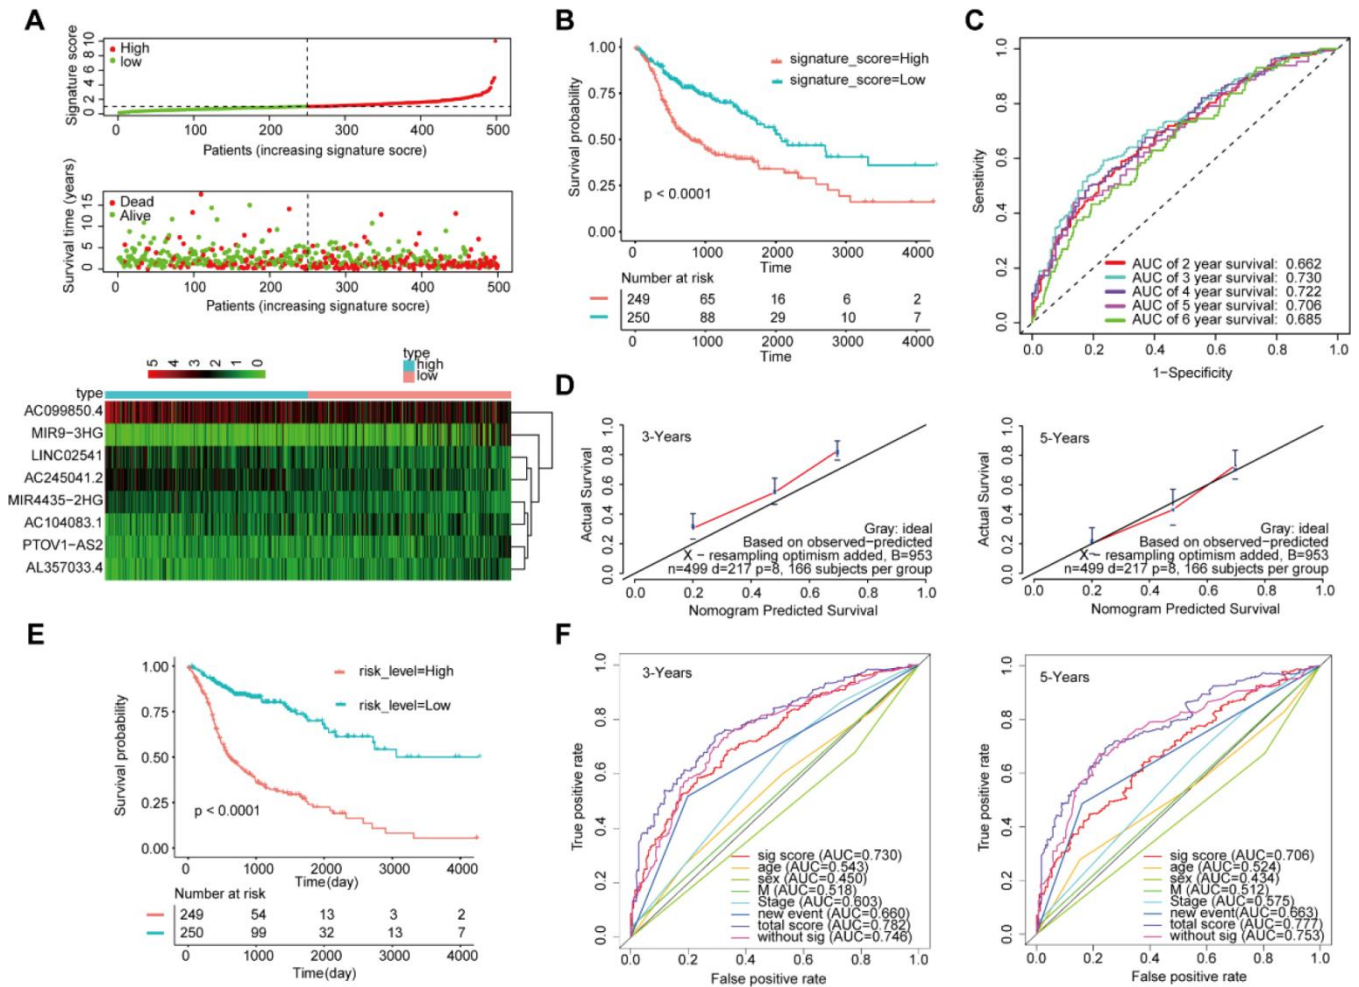

**Supplementary Figure 2. Validation of the model by the entire TCGA-HNSCC set (n=499).** (A) Distribution of 8-lncRNA-based signature scores, lncRNA expression levels and patient survival durations in the entire set. (B) Kaplan-Meier curves of OS based on the 8-lncRNA signature. (C) ROC curve analyses based on the 8-lncRNA signature. (D) Calibration curves of the nomogram for the estimation of survival rates at 3 and 5 years. (E) Kaplan-Meier curves of OS according to the total risk score. (F) ROC curves according to the nomogram and lncRNA signature score.

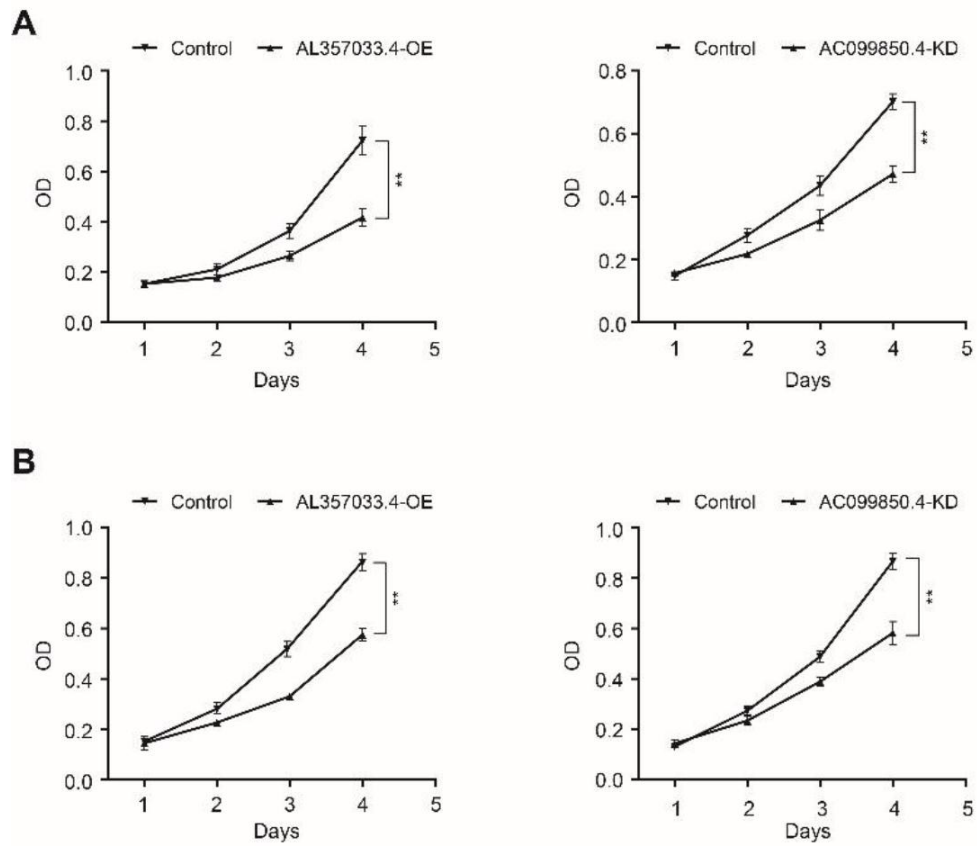

**Supplementary Figure 3.** Proliferation of FaDu (A) and Hep-2 (B) cells was analyzed using CCK-8 assay following lncRNAs overexpression or knockdown.
