# Supplementary material for: Identification of a nomogram based on an 8-lncRNA signature as a novel diagnostic biomarker for head and neck squamous cell carcinoma
Source: publisher site journal article supplement (doi:10.18632/aging.104014), 2020-10-20
Supplement: Supplementary file [file aging-v12i20-104014-supplementary-material-SD3.pdf]

## SUPPLEMENTARY TABLE

Supplementary Table 1. Primers used in the study.

| Gene        | Sequence                                                   | Product length (bp) |
|-------------|------------------------------------------------------------|---------------------|
| MIR9-3HG    | 5'-GCCAGGCTTACTGTCTCTGG-3'<br>3'-GAGCCAAGACCTATCCACCA-5'   | 170                 |
| AC099850.4  | 5'-TCACCATGCCTGGGTAATTT-3'<br>3'-TGCCAAGGAATCTCTGAAGTC-5'  | 151                 |
| MIR4435-2HG | 5'-CATTTTTCCCTGCTCTGCTC-3'<br>3'-ATCAAGGAGGGCTCATGTTG-5'   | 151                 |
| AC104083.1  | 5'-AGCCTTCCAGATTGTGAGGA-3'<br>3'-ACATTGGGCTGTCCA ACTTC-5'  | 209                 |
| AC245041.2  | 5'-AGGAGCCAGACATGTGGAGT-3'<br>3'-CAGAGCTTCTGCTGTGCAGT-5'   | 208                 |
| AL357033.4  | 5'-TCGGTCATCAGTTCATCAA-3'<br>3'-TAGCAGTGAACGCAGAGGTG-5'    | 166                 |
| LINC02541   | 5'-CCAGGCTGGAGTATGATGGT-3'<br>3'-TGGTGAAACCCCGTCTCTAC-5'   | 160                 |
| PTOV1-AS2   | 5'-CTGTCCCTGAGGAGTGGAGA-3'<br>3'-AGCGGTGGAGATGACGTTTC-5'   | 178                 |
| GAPDH       | 5'-GAAAGCCTGCCGGTGACTAA-3'<br>3'-GCCCAATACGACCAAATCAGAG-5' | 150                 |
